# Supplementary material for: Rv3737 is required for Mycobacterium tuberculosis growth in vitro and in vivo and correlates with bacterial load and disease severity in human tuberculosis
Source: BMC Infect Dis. 2022 Mar 14;22:256. doi: 10.1186/s12879-021-06967-y (PMC8919692; doi:10.1186/s12879-021-06967-y)
Supplement: Supplementary file 3 — Additional file 3: Table S2. List of primer used in this study. [file 12879_2021_6967_MOESM3_ESM.docx]

**Table S2. List of primer used in this study**

| S1.No | Name of primer | Sequence(5’-3’) | Product length |
| --- | --- | --- | --- |
| 1a | LFP | TTTTTTTTGGCCTAAATGGCCCCCAGTTATCGCCATCCG | 781 |
| 2a | LRP | TTTTTTTTGGCCTTTCTGGCCCAATGCCGTGTTGTCCGA |
| 3a | RFP | TTTTTTTTGGCCTAGATGGCCCCAAGAGCCAGCAGCCGA | 640 |
| 4a | RRP | TTTTTTTTGGCCTCTTTGGCCGTCTTTGCGGTCCTGGCG |
| 5b | LYZFP | CAATGGATTTCGGGAGAC | 1064 |
| 6b | LYZRP | GTGGACCTCGACGACCCTAG |
| 7b | RYZFP | TGGATCTCTCCGGCTTCACC | 1064 |
| 8b | RYZRP | TACTGTTCAACGGCGGTG |
| 9c | Rv3737 For | GTTCGCCGTCAATGACACAC | 115 |
| 10c | Rv3737 Rev | CAATGGTGAGGCGAGGAACT |
| 11c | M.tb-sigA For | CTCGGTTCGCGCCTACCTCA | 130 |
| 12c | M.tb-sigA Rev | GCGCTCGCTAAGCTCGGTCA |
| 13d | TNF-α For | AAGCCTGTAGCCCACGTCGTA | 122 |
| 14d | TNF-α Rev | GGCACCACTAGTTGGTTGTCTTTG |
| 15d | IL-6 For | ACAACCACGGCCTTCCCTACTT | 129 |
| 16d | IL-6 Rev | CACGATTTCCCAGAGAACATGTG |
| 17d | GAPDH For | GAGCCAAACGGGTCATCATCT | 232 |
| 18d | GAPDH Rev | GAGGGGCCATCCACAGTCTT |
| 19e | pMV-Rv3737-ECOR I-For | CCGGAATTCCGGATGGACTACAAAGACGATGACGACAAG GATCAAGATCGATCGGACAACAC | 1590 |
| 20e | pMV-Rv3737-Hind III-Rev | CCCAAGCTTGGG CTAGCGCACCTCGGTCGCG |

Note：a Primers are used in PCR to construct the left and right arms of the target gene

b Primers are used in PCR to verify the successful construction of the knockout strain

c Primers are used in qPCR to verify the successful construction of the knockout strain

d Primers are used in qPCR to detect inflammatory factor expression

e Primers are used in PCR to amplify the entire gene sequence of Rv3737 and used for overexpression
